# Supplementary material for: Dissecting Functions of the Conserved Oligomeric Golgi Tethering Complex Using a Cell-Free Assay
Source: PubMed Central journal article supplement (PMC3892563; doi:10.1111/tra.12128), 2013-10-31
Supplement: NIHMS531612-supplement-Supp_Figure_S1.pdf [file NIHMS531612-supplement-Supp_Figure_S1.pdf]

# Cottam et al Supplementary Figure 1

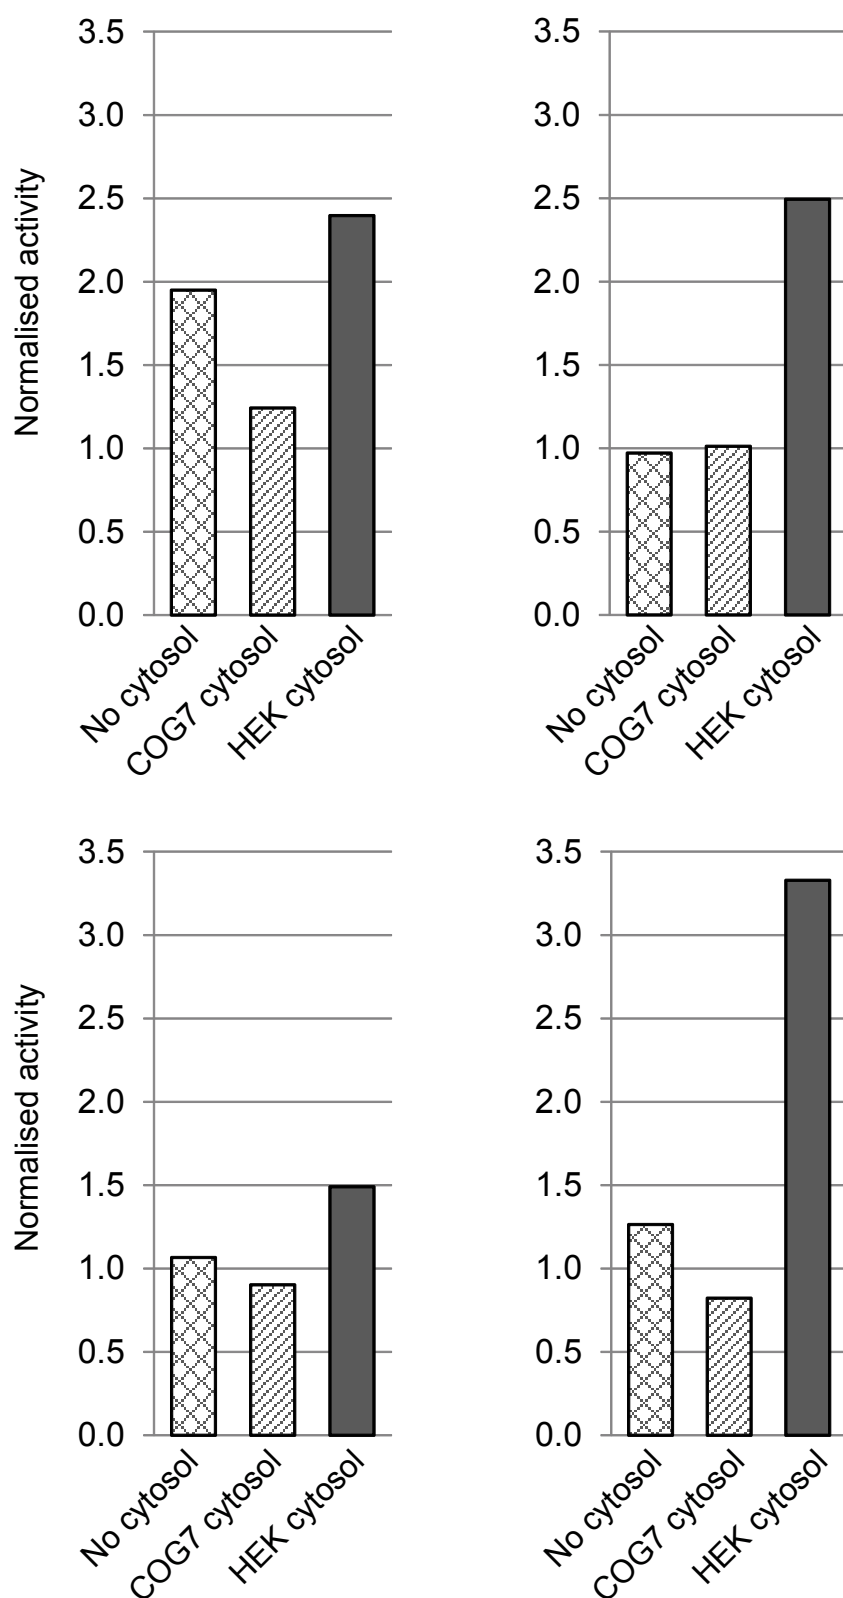

Four separate experiments containing different batches of the same components. For details see Fig. 3A.
